# Supplementary material for: Charge transfer-induced photoluminescence in ZnO nanoparticles
Source: Royal Society of Chemistry journal article supplement (doi:10.1039/c9nr02020a), 2019-01-01
Supplement: c9nr02020a1.pdf [file c9nr02020a1.pdf]

## Supporting Information

### Charge Transfer Induced Photoluminescence in ZnO Nanoparticles

*Yuhui Ma, Ting-Wing Choi, Sin Hang Cheung, Yuanhang Cheng, Xiuwen Xu, Yue-Min Xie, Ho-Wa Li, Menglin Li, Huixia Luo, Wenjuan Zhang, Shu Kong So, Song Chen\*, Sai-Wing Tsang\**

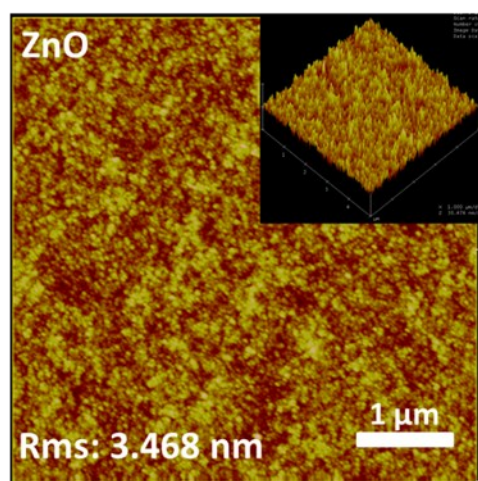

**Figure S1.** Atomic force microscopy (AFM) topography ( $5 \times 5 \mu\text{m}$ ) of ZnO film. The scale bar:  $1 \mu\text{m}$ .

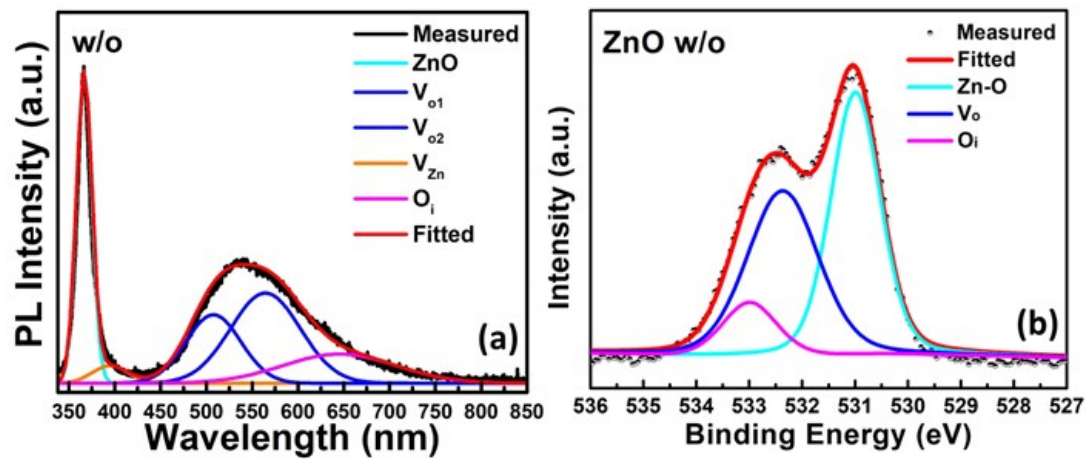

**Figure S2.** Previously reported defect analysis approach: Gaussian fitting of (a) ZnO NP film PL spectrum, and (b) high-resolution XPS spectrum of O 1s ZnO NP film.

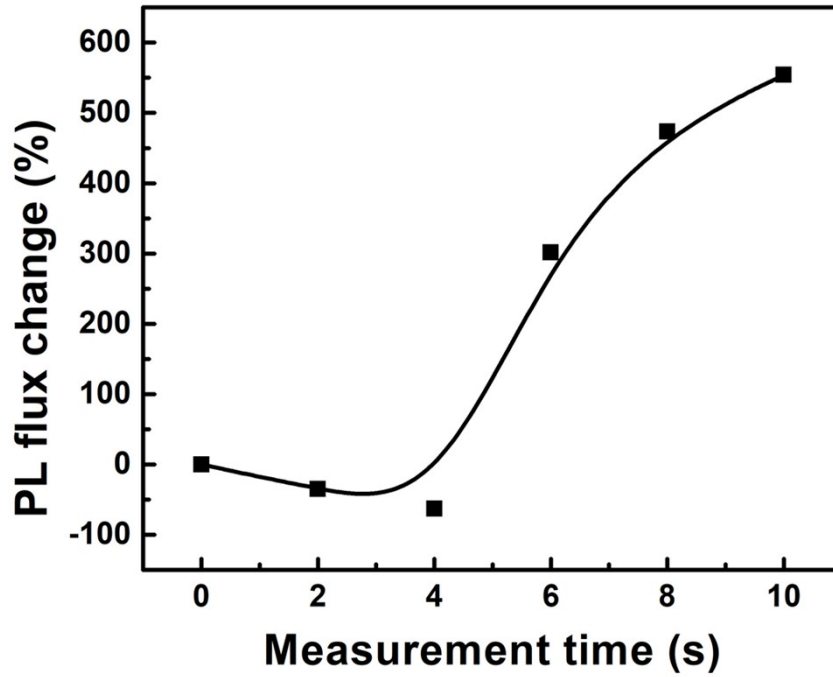

**Figure S3.** The calculated PL flux change at different exposure time in O<sub>2</sub> with respective to the PL flux at t = 0.

The PL photon flux at different exposure time, Flux<sub>t</sub>, is calculated with the data shown in Figure 2 (b) and the calibrated responsivity of the CCD array (flux/count) using the following equation.

$$\frac{Flux_t - Flux_{t=0}}{Flux_{t=0}} \times 100\% \quad (1)$$

This result shows the relative change of photon flux with respect to the flux at t = 0. It gives the estimation of the change of PL quantum yield.

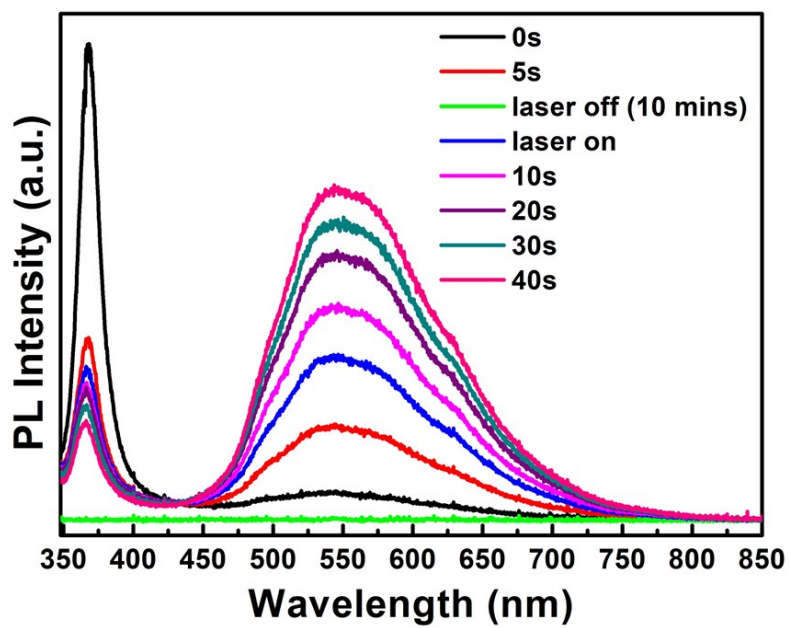

**Figure S4.** PL spectrum of ZnO NP thin film with excitation laser cut off for 10 minutes and on.

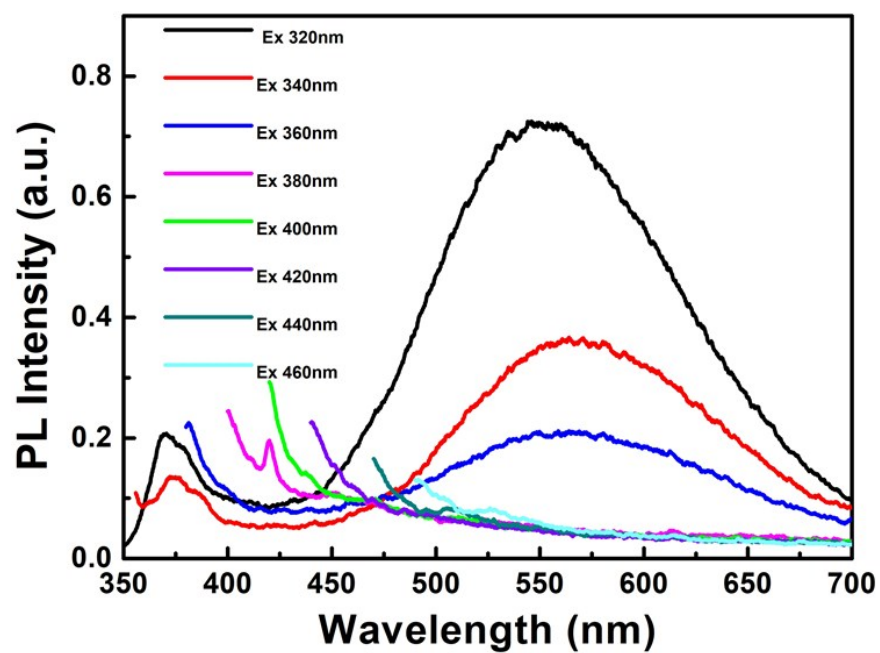

**Figure S5.** Excitation dependent PL of ZnO NP thin film with every 20 nm interval wavelength. The visible emission can only be observed with above bandgap (<360 nm) excitation.

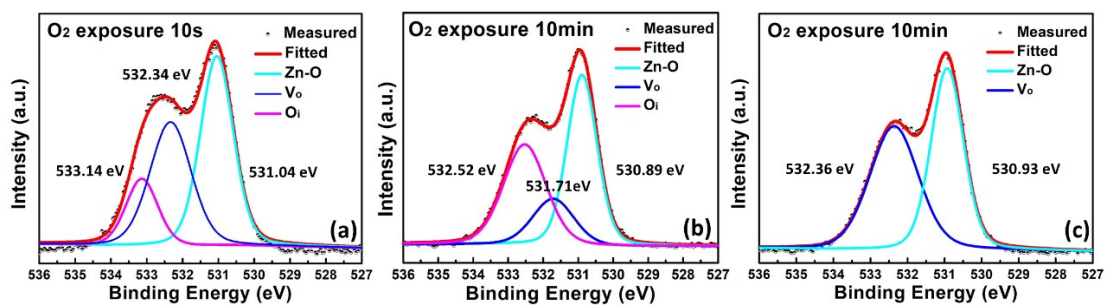

**Figure S6.** Gaussian fitting of XPS spectra of ZnO film with O<sub>2</sub> exposure for (a) 10 s and (b) and (c) 10 min.

According to the most widely adopted approach reported in literatures, the O 1s peak can be deconvoluted into three peaks corresponding to the binding energies of oxygen of Zn-O (531eV), oxygen vacancy V<sub>O</sub> (532 eV), and oxygen interstitial O<sub>i</sub> (533eV). However, we have found that the analysis by peak fitting is not reliable, and even contradictory.

For example, when comparing the 10 s and 10 mins UV+O<sub>2</sub> exposed samples as shown in Figure S6, the peak fitting has multiple solutions. One solution (Figure S6b) suggests an reduce of V<sub>o</sub> and increase of O<sub>i</sub>, another solution (Figure S6c) on the other hand suggests an increase of V<sub>o</sub> and reduce of O<sub>i</sub>. Consequently, such multiple solutions from peak fitting have also been found in other samples.
